# Supplementary material for: Simultaneous determination of multiple components in explosives using ultraviolet spectrophotometry and a partial least squares method
Source: Royal Society of Chemistry journal article supplement (doi:10.1039/c4ra12647e), 2015-01-01
Supplement: c4ra12647e1.pdf [file c4ra12647e1.pdf]

## Supporting Information

### Simultaneous determination of multicomponent in explosives using ultraviolet spectrophotometry and partial least square method

Tao Lu <sup>a</sup>, Yuan Yuan <sup>c</sup>, Xuan He <sup>b</sup>, Menglong Li <sup>a</sup>, Xuemei Pu <sup>a,\*</sup>, Tao Xu <sup>b,\*</sup>,  
Zhining Wen <sup>a,\*</sup>

<sup>a</sup> *College of Chemistry, Sichuan University, Chengdu 610064, People's Republic of China*

<sup>b</sup> *Institute of Chemical Materials, Chinese Academy of Engineering Physics, Mianyang  
621900, People's Republic of China*

<sup>c</sup> *College of Management, Southwest University for Nationalities, Chengdu 610041, People's  
Republic of China*

\*Corresponding author: Prof. X. M. Pu

Email address: [xmpuscu@scu.edu.cn](mailto:xmpuscu@scu.edu.cn)

Tel.: +86-028-85412290

Fax: +86-028-85412290

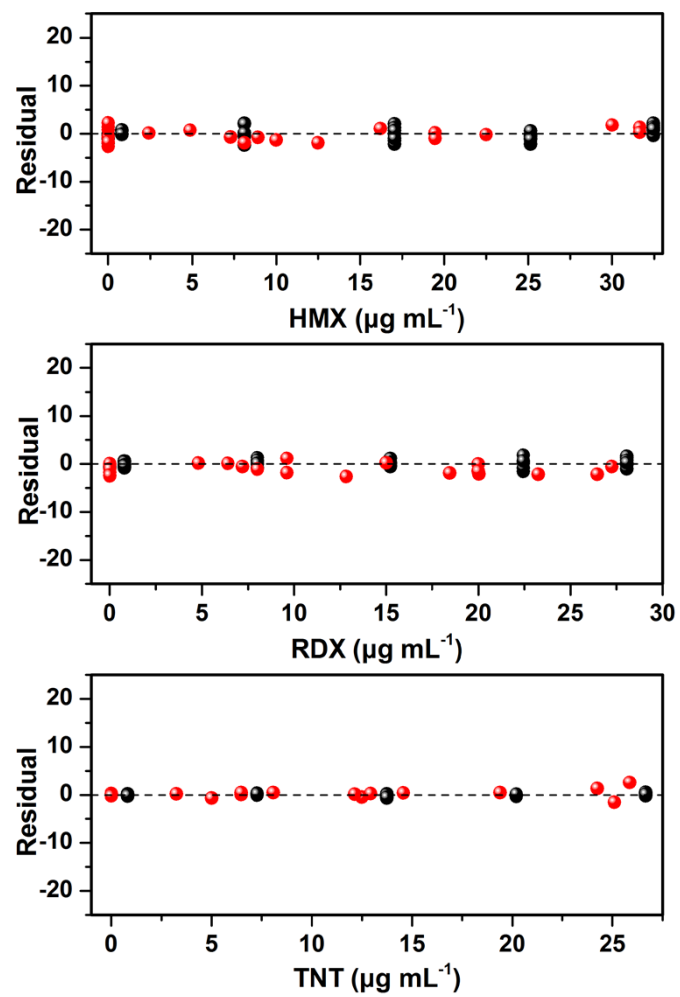

**Fig. S1.** Absolute residual distribution of PLS-2 model vs concentrations plots for the three components for the calibration (●) and independent test (●) samples.
